# Supplementary material for: Exosomal miR-132-3p from mesenchymal stromal cells improves synaptic dysfunction and cognitive decline in vascular dementia
Source: PubMed Central journal article supplement (PMC9284820; doi:10.1186/s13287-022-02995-w), 2022-07-15

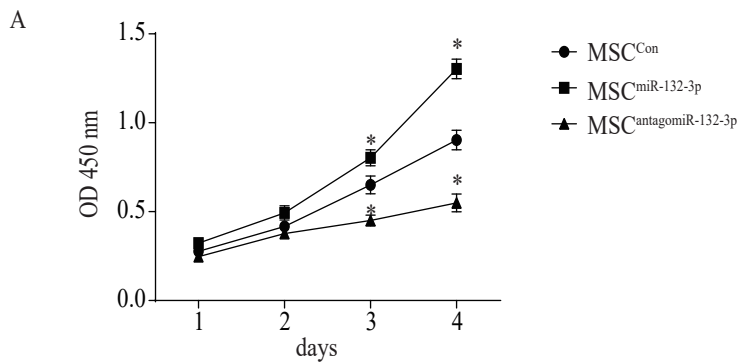

B

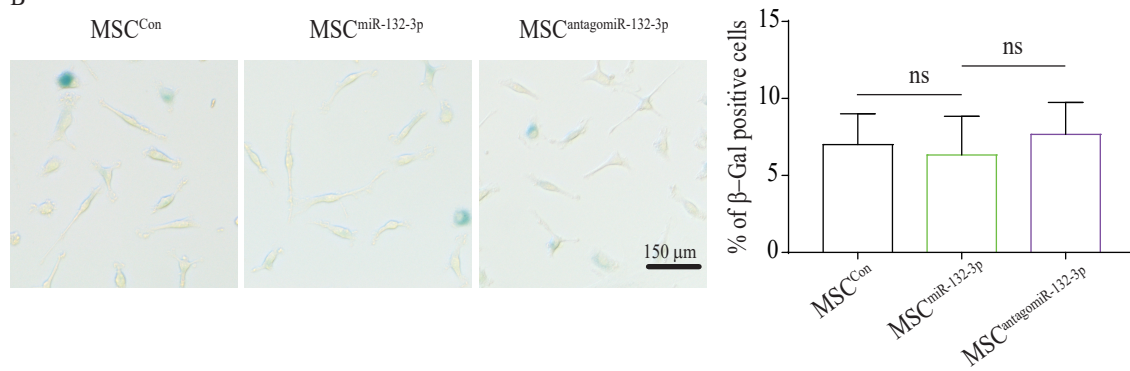

Supplement: 13287_2022_2995_MOESM1_ESM.pdf [file 13287_2022_2995_MOESM1_ESM.pdf]
